# Supplementary material for: The establishment of variant surface glycoprotein monoallelic expression revealed by single-cell RNA-seq of Trypanosoma brucei in the tsetse fly salivary glands
Source: PLoS Pathog. 2021 Sep 20;17(9):e1009904. doi: 10.1371/journal.ppat.1009904 (PMC8509897; doi:10.1371/journal.ppat.1009904)
Supplement: S1 Table — (XLSX) [file ppat.1009904.s012.xlsx]

## Sheet: sctAllmarkers
gene	p_val	avg_logFC	pct.1	pct.2	p_val_adj	cluster	Product Description
Tb927.9.7470	0	1.55807	0.972	0.253	0	Midgut forms	purine nucleoside transporter
Tb927.3.4500	1.30824e-164	0.903558	0.761	0.081	9.65614e-161	Midgut forms	Fumarate hydratase class I, cytosolic
Tb927.7.7090	4.85119e-163	1.05452	0.908	0.191	3.58066e-159	Midgut forms	hypothetical protein, conserved
Tb927.9.9370	2.33868e-128	0.806622	0.754	0.119	1.72618e-124	Midgut forms	PSP1 C-terminal conserved region, putative
Tb927.10.15410	7.29946e-118	0.707886	0.69	0.089	5.38773e-114	Midgut forms	glycosomal malate dehydrogenase
Tb927.4.4730	1.90577e-108	0.682039	0.613	0.06	1.40665e-104	Midgut forms	amino acid transporter, putative
Tb927.10.12780	1.20922e-103	0.683183	0.704	0.14	8.92522e-100	Midgut forms	Zinc finger CCCH domain-containing protein 37
Tb927.1.4100	8.5195e-103	0.756958	0.775	0.139	6.28824e-99	Midgut forms	cytochrome oxidase subunit IV
Tb927.5.2160	8.64642e-102	0.868823	0.739	0.185	6.38192e-98	Midgut forms	conserved protein
Tb927.6.3490	3.05223e-100	0.934345	1	0.855	2.25285e-96	Midgut forms	zinc finger protein 1
Tb927.10.9080	8.3172e-92	0.915863	0.958	0.48	6.13892e-88	Midgut forms	pteridine transporter, putative
Tb927.11.2930	8.83108e-81	0.532582	0.592	0.072	6.51822e-77	Midgut forms	membrane-associated protein, putative
Tb927.6.450	1.48091e-80	2.04425	0.979	0.437	1.09306e-76	Midgut forms	procyclin PARP A
Tb927.8.8300	8.74796e-69	0.639909	0.697	0.134	6.45687e-65	Midgut forms	amino acid transporter, putative
Tb927.6.2790	6.09112e-67	0.74171	0.739	0.235	4.49585e-63	Midgut forms	L-threonine 3-dehydrogenase
Tb927.10.8530	6.42386e-66	0.623951	0.577	0.108	4.74145e-62	Midgut forms	glucose transporter 2A
Tb927.11.2690	6.07291e-64	0.719897	0.838	0.3	4.48242e-60	Midgut forms	Succinyl-CoA:3-ketoacid coenzyme A transferase, mitochondrial
Tb927.10.6200	3.75559e-58	0.387512	0.437	0.044	2.772e-54	Midgut forms	hypothetical protein, conserved
Tb927.10.4880	2.47463e-56	0.438903	0.472	0.081	1.82652e-52	Midgut forms	hypothetical protein, conserved
Tb927.3.1410	8.05501e-56	0.384166	0.423	0.038	5.94541e-52	Midgut forms	cytochrome oxidase subunit VII
Tb927.11.12040	7.15186e-54	0.505818	0.577	0.117	5.27879e-50	Midgut forms	Cytochrome c oxidase component, putative
Tb927.6.1520	7.90516e-54	0.720545	0.88	0.452	5.8348e-50	Midgut forms	Aquaglyceroporin 1
Tb927.7.5940	2.06132e-53	0.606572	0.697	0.157	1.52146e-49	Midgut forms	Protein Associated with Differentiation
Tb927.9.13200	1.45199e-52	0.352465	0.366	0.034	1.07172e-48	Midgut forms	hypothetical protein
Tb927.11.16200	2.48816e-47	0.407854	0.38	0.046	1.83651e-43	Midgut forms	cytoskeleton-associated protein 17
Tb927.11.6280	7.67166e-47	0.382196	0.415	0.069	5.66245e-43	Midgut forms	pyruvate phosphate dikinase
Tb927.10.10250	6.18905e-46	1.55813	0.958	0.316	4.56814e-42	Midgut forms	EP2 procyclin
Tb927.10.7090	8.87448e-46	-0.895468	0.458	0.925	6.55025e-42	Midgut forms	Alternative oxidase, mitochondrial
Tb927.9.3170	9.36741e-46	0.347735	0.387	0.058	6.91409e-42	Midgut forms	cytochrome oxidase subunit V
Tb927.10.280	2.77473e-45	0.393378	0.451	0.066	2.04803e-41	Midgut forms	cytochrome oxidase subunit VI
Tb927.10.2560	1.15229e-44	0.598166	0.69	0.207	8.50508e-41	Midgut forms	mitochondrial malate dehydrogenase
Tb927.11.7490	7.20083e-41	0.414464	0.38	0.056	5.31493e-37	Midgut forms	Protein of unknown function (DUF423), putative
Tb927.1.2340	9.91988e-36	0.54301	0.993	0.964	7.32186e-32	Midgut forms	alpha tubulin
Tb927.3.3750	1.18656e-35	0.533498	0.718	0.258	8.75801e-32	Midgut forms	paraflagellar rod component, putative
Tb927.5.320	5.15045e-35	0.353802	0.352	0.064	3.80155e-31	Midgut forms	receptor-type adenylate cyclase GRESAG 4, putative
Tb927.8.5120	2.0085e-34	0.392637	0.472	0.098	1.48247e-30	Midgut forms	cytochrome c
Tb927.1.2820	1.0389e-32	0.775209	0.859	0.381	7.66809e-29	Midgut forms	pteridine transporter, putative
Tb927.10.8320	1.25115e-31	0.308129	0.338	0.057	9.23472e-28	Midgut forms	cytochrome oxidase subunit IX, putative
Tb927.11.510	2.206e-31	0.533159	0.901	0.679	1.62825e-27	Midgut forms	RNA-binding protein, UBP2
Tb927.1.2260	5.11822e-31	0.485304	0.69	0.314	3.77776e-27	Midgut forms	small myristoylated protein 1-2
Tb927.10.12760	9.43599e-31	0.490576	0.549	0.168	6.9647e-27	Midgut forms	zinc finger protein family member, putative
Tb927.4.1000	1.03369e-30	0.501548	0.831	0.504	7.62963e-27	Midgut forms	hypothetical protein, conserved
Tb927.1.2320	1.55357e-30	0.58414	0.951	0.847	1.14669e-26	Midgut forms	Cardiolipin-dependent protein 35kDa
Tb927.1.1470	3.03757e-30	0.497628	0.69	0.279	2.24203e-26	Midgut forms	conserved protein, unknown function
Tb927.4.3320	2.11623e-29	0.467363	0.761	0.362	1.56199e-25	Midgut forms	uracil phosphoribosyltransferase, putative
Tb927.5.1060	1.19039e-28	0.268322	0.345	0.057	8.78624e-25	Midgut forms	mitochondrial processing peptidase, beta subunit, putative
Tb927.7.4390	1.22642e-28	0.345683	0.296	0.051	9.05219e-25	Midgut forms	threonine synthase, putative
Tb927.7.1790	3.48025e-28	0.253859	0.352	0.057	2.56878e-24	Midgut forms	Adenine phosphoribosyltransferase, putative
Tb927.8.6060	5.84284e-27	0.349675	0.437	0.151	4.3126e-23	Midgut forms	2-amino-3-ketobutyrate coenzyme A ligase
Tb927.9.11600	5.42336e-25	0.405923	0.613	0.26	4.00298e-21	Midgut forms	glycosomal membrane protein
Tb927.9.6210	5.89919e-25	0.446141	0.542	0.159	4.35419e-21	Midgut forms	arginine kinase
Tb927.7.5970	6.6533e-25	0.279913	0.31	0.059	4.9108e-21	Midgut forms	protein associated with differentiation 5, putative
Tb927.1.4650	2.36767e-24	-0.625671	0.641	0.886	1.74757e-20	Midgut forms	cyclin-like F-box protein 2
Tb927.7.5930	3.86064e-24	0.255915	0.289	0.06	2.84954e-20	Midgut forms	Protein Associated with Differentiation 1
Tb927.8.5110	4.7177e-24	0.442378	0.817	0.48	3.48213e-20	Midgut forms	hypothetical protein, conserved
Tb927.8.6650	6.02216e-24	0.344337	0.493	0.181	4.44496e-20	Midgut forms	RNA-binding protein, putative
Tb927.10.8050	8.88133e-24	0.317128	0.43	0.122	6.55531e-20	Midgut forms	TFIIF-stimulated CTD phosphatase, putative
Tb927.10.2970	1.11931e-23	0.288382	0.408	0.124	8.26165e-20	Midgut forms	hypothetical protein, conserved
Tb927.8.7820	1.12638e-23	-0.624405	0.373	0.76	8.3138e-20	Midgut forms	'Cold-shock' DNA-binding domain containing protein, putative
Tb927.1.2330	9.93634e-23	0.471813	0.93	0.763	7.33402e-19	Midgut forms	beta tubulin
Tb927.11.6890	1.03699e-22	0.550748	0.986	0.892	7.65404e-19	Midgut forms	DNA repair and recombination helicase protein PIF1
Tb927.10.12840	1.2647e-22	0.354416	0.507	0.154	9.33478e-19	Midgut forms	mitochondrial carrier protein
Tb927.11.6180	4.96713e-22	0.440986	0.88	0.696	3.66624e-18	Midgut forms	60S ribosomal protein L28, putative
Tb927.9.7830	1.06706e-21	0.278481	0.338	0.095	7.87595e-18	Midgut forms	tRNA import complex component, putative
Tb927.1.2230	1.67388e-21	0.429538	0.577	0.201	1.23549e-17	Midgut forms	small myristoylated protein 1-1
Tb927.10.10260	2.39178e-21	1.07142	0.944	0.566	1.76537e-17	Midgut forms	EP1 procyclin
Tb927.4.3950	4.56559e-21	0.451128	0.577	0.231	3.36987e-17	Midgut forms	cytoskeleton-associated protein CAP5.5, putative
Tb927.4.4620	1.6613e-20	0.277635	0.387	0.119	1.22621e-16	Midgut forms	cytochrome oxidase subunit VIII
Tb927.7.3970	1.83169e-20	0.412551	0.683	0.338	1.35197e-16	Midgut forms	hypothetical protein, conserved
Tb927.10.10980	3.16958e-20	-0.476796	0.817	0.951	2.33946e-16	Midgut forms	heat shock protein 90, putative
Tb927.8.5260	3.54508e-20	0.412554	0.796	0.567	2.61662e-16	Midgut forms	60S ribosomal protein L39, putative
Tb927.10.15350	1.47671e-19	0.423757	0.887	0.574	1.08996e-15	Midgut forms	histone H3 variant V
Tb927.2.1210	1.99238e-19	-0.470696	0.648	0.883	1.47057e-15	Midgut forms	retrotransposon hot spot protein 4 (RHS4), putative
Tb927.9.12360	6.40993e-18	0.359956	0.634	0.307	4.73117e-14	Midgut forms	RNA-binding protein, putative
Tb927.5.3620	9.50671e-18	0.347951	0.627	0.285	7.0169e-14	Midgut forms	kinetoplastid-specific dual specificity phosphatase, putative
Tb927.11.14750	9.6049e-18	0.292738	0.38	0.1	7.08938e-14	Midgut forms	PSP1 C-terminal conserved region, putative
Tb927.10.11390	1.98421e-17	0.384352	0.746	0.566	1.46454e-13	Midgut forms	60S ribosomal protein L6, putative
Tbb1125VSG-4862	3.05848e-17	-1.14754	0.162	0.338	2.25746e-13	Midgut forms	#N/A
Tb927.5.350	3.6717e-17	-0.531944	0.225	0.6	2.71008e-13	Midgut forms	75 kDa invariant surface glycoprotein, putative
Tb927.2.340	4.80521e-17	-0.513618	0.254	0.652	3.54672e-13	Midgut forms	retrotransposon hot spot protein 4 (RHS4), putative
Tb927.4.1790	9.62179e-17	0.354498	0.944	0.888	7.10184e-13	Midgut forms	ribosomal protein L3, putative
Tb927.1.110	1.51287e-16	-0.49467	0.275	0.649	1.11665e-12	Midgut forms	hypothetical protein, conserved
Tb927.10.14270	1.72934e-16	0.376447	0.725	0.401	1.27643e-12	Midgut forms	TFIIF-stimulated CTD phosphatase, putative
Tbb1125VSG-393	2.57875e-16	-1.02707	0.204	0.419	1.90338e-12	Midgut forms	#N/A
Tb927.10.11630	2.97593e-16	0.250581	0.352	0.116	2.19653e-12	Midgut forms	PSP1 C-terminal conserved region, putative
Tb927.7.6600	3.98404e-16	-0.541593	0.12	0.504	2.94062e-12	Midgut forms	hypothetical protein, conserved
Tb927.2.2160	6.2503e-16	0.339899	0.592	0.288	4.61334e-12	Midgut forms	paraflagellar rod component, putative
Tb927.4.1910	6.29854e-16	0.385765	0.493	0.218	4.64895e-12	Midgut forms	hypothetical protein, conserved
Tb927.7.6560	1.90946e-15	-0.527581	0.127	0.49	1.40937e-11	Midgut forms	hypothetical protein, conserved
Tb927.2.470	3.89166e-15	-0.438447	0.542	0.795	2.87243e-11	Midgut forms	retrotransposon hot spot protein 4 (RHS4), putative
Tb927.7.5790	1.11052e-14	-0.472818	0.218	0.569	8.19676e-11	Midgut forms	protein disulfide isomerase, putative
Tb927.10.8940	1.13017e-14	0.355318	0.944	0.834	8.34176e-11	Midgut forms	flagellum targeting protein kharon1, putative
Tb927.7.6570	1.14036e-14	-0.49851	0.162	0.488	8.41701e-11	Midgut forms	Enriched in surface-labeled proteome protein 17
Tb927.11.11330	1.36874e-14	-0.468045	0.246	0.577	1.01027e-10	Midgut forms	heat shock protein 70
Tb927.10.12800	1.87631e-14	-0.478186	0.338	0.614	1.3849e-10	Midgut forms	Zinc finger CCCH domain-containing protein 38
Tb927.5.630	2.20743e-14	-0.477804	0.169	0.509	1.6293e-10	Midgut forms	acidic phosphatase, putative
Tb927.2.450	2.60544e-14	-0.439543	0.345	0.678	1.92307e-10	Midgut forms	retrotransposon hot spot protein 4 (RHS4), putative
Tb927.3.3270	2.8414e-14	-0.495275	0.148	0.46	2.09724e-10	Midgut forms	ATP-dependent 6-phosphofructokinase, glycosomal
Tb927.8.6180	3.59069e-14	0.367666	0.754	0.546	2.65029e-10	Midgut forms	60S ribosomal protein L26, putative
Tb927.8.6150	4.10175e-14	0.359607	0.725	0.571	3.0275e-10	Midgut forms	40S ribosomal protein S8, putative
Tb927.10.5370	4.58622e-14	0.344137	0.789	0.639	3.38509e-10	Midgut forms	40S ribosomal protein S10, putative
Tb927.10.3280	4.65766e-14	0.344208	0.669	0.503	3.43782e-10	Midgut forms	60S ribosomal proteins L38, putative
Tb927.7.5000	5.72361e-14	0.336566	0.894	0.709	4.2246e-10	Midgut forms	60S ribosomal protein L19, putative
Tb927.7.6550	6.47789e-14	-0.475646	0.155	0.487	4.78133e-10	Midgut forms	hypothetical protein, conserved
Tb927.11.500	9.37209e-14	0.3327	0.958	0.872	6.91754e-10	Midgut forms	RNA-binding protein, UBP1
Tb927.7.6580	1.95731e-13	-0.461168	0.155	0.486	1.44469e-09	Midgut forms	hypothetical protein
Tb927.2.2770	2.04768e-13	0.373236	0.761	0.49	1.51139e-09	Midgut forms	hypothetical protein, conserved
Tb927.9.15640	3.69457e-13	-0.632237	0.134	0.393	2.72697e-09	Midgut forms	BARP protein
Tb927.8.1870	3.81489e-13	-0.42078	0.352	0.632	2.81577e-09	Midgut forms	Golgi/lysosome glycoprotein 1
Tb927.9.15420	5.46079e-13	0.32211	0.768	0.598	4.03061e-09	Midgut forms	60S ribosomal protein L32
Tb927.6.2100	5.90884e-13	0.336296	0.697	0.493	4.36132e-09	Midgut forms	40S ribosomal protein S30, putative
Tb927.10.70	7.81487e-13	-0.390702	0.521	0.75	5.76816e-09	Midgut forms	retrotransposon hot spot (RHS), putative, (fragment)
Tb927.11.9720	8.44173e-13	0.324865	0.838	0.614	6.23084e-09	Midgut forms	40S ribosomal protein S27, putative
Tb927.5.1810	8.95899e-13	-0.406665	0.31	0.595	6.61263e-09	Midgut forms	lysosomal/endosomal membrane protein p67
Tb927.9.4130	1.01101e-12	0.33096	0.669	0.396	7.4623e-09	Midgut forms	hypothetical protein, conserved
Tb927.8.910	1.52065e-12	0.337228	0.831	0.662	1.12239e-08	Midgut forms	hypothetical protein, conserved
Tb927.7.2660	1.87572e-12	0.344466	0.739	0.493	1.38447e-08	Midgut forms	zinc finger protein family member, putative
Tb927.7.7520	2.09756e-12	-0.426183	0.197	0.47	1.54821e-08	Midgut forms	receptor-type adenylate cyclase GRESAG 4, putative
Tb927.2.3270	2.13831e-12	-0.422259	0.113	0.439	1.57829e-08	Midgut forms	65 kDa invariant surface glycoprotein
Tb927.6.4280	2.16757e-12	-0.438953	0.225	0.489	1.59989e-08	Midgut forms	glyceraldehyde 3-phosphate dehydrogenase, glycosomal
Tbb1125VSG-1654	2.18229e-12	-1.08721	0.155	0.321	1.61075e-08	Midgut forms	#N/A
Tb927.8.3530	3.38379e-12	0.318318	0.514	0.315	2.49757e-08	Midgut forms	glycerol-3-phosphate dehydrogenase [NAD+], glycosomal
Tb927.5.310	3.66225e-12	-0.408128	0.155	0.455	2.70311e-08	Midgut forms	invariant surface glycoprotein, putative
Tb927.8.6030	3.97558e-12	0.317628	0.648	0.443	2.93437e-08	Midgut forms	60S ribosomal protein L12, putative
Tb927.9.3920	6.10505e-12	0.317267	0.845	0.751	4.50614e-08	Midgut forms	ribosomal protein S7, putative
Tb927.6.690	7.60741e-12	0.322957	0.627	0.387	5.61503e-08	Midgut forms	hypothetical protein, conserved
Tb927.11.3230	8.30243e-12	0.300766	0.768	0.591	6.12802e-08	Midgut forms	60S ribosomal protein L44
Tb927.10.7330	9.3913e-12	0.331647	0.768	0.567	6.93172e-08	Midgut forms	40S ribosomal protein S24E, putative
Tb927.2.560	1.18412e-11	-0.382335	0.19	0.491	8.73999e-08	Midgut forms	retrotransposon hot spot protein 4 (RHS4), putative
Tb927.9.12200	1.80908e-11	0.29731	0.796	0.651	1.33528e-07	Midgut forms	60S ribosomal subunit protein L31, putative
Tb927.1.580	1.98641e-11	0.370679	0.613	0.336	1.46617e-07	Midgut forms	phosphate-repressible phosphate permease, putative
Tb927.7.6490	2.51739e-11	-0.403309	0.099	0.391	1.85808e-07	Midgut forms	hypothetical protein, conserved
Tb927.10.1100	2.70351e-11	0.292087	0.775	0.696	1.99546e-07	Midgut forms	60S ribosomal protein L9, putative
Tb927.11.15880	4.91869e-11	0.299386	0.852	0.759	3.63048e-07	Midgut forms	60S ribosomal protein L27, putative
Tb927.8.7740	5.03576e-11	-0.391146	0.134	0.427	3.7169e-07	Midgut forms	amino acid transporter, putative
Tb927.9.15210	5.18729e-11	0.309919	0.754	0.572	3.82874e-07	Midgut forms	ribosomal protein L36, putative
Tb927.10.6050	6.75064e-11	-0.366772	0.303	0.57	4.98265e-07	Midgut forms	clathrin heavy chain
Tb927.1.180	7.32731e-11	-0.353598	0.535	0.739	5.40828e-07	Midgut forms	retrotransposon hot spot protein 1 (RHS1), putative
Tb927.8.7610	7.65353e-11	-0.443844	0.218	0.406	5.64907e-07	Midgut forms	amino acid transporter 1, putative
Tb927.7.5950	7.67299e-11	-0.473982	0.261	0.422	5.66344e-07	Midgut forms	protein associated with differentiation 3, putative
Tb927.10.2090	8.87389e-11	-0.383656	0.373	0.642	6.54982e-07	Midgut forms	elongation factor 1-alpha
Tb927.11.6300	1.05328e-10	0.304555	0.824	0.699	7.77428e-07	Midgut forms	40S ribosomal protein S5, putative
Tb927.8.6340	1.47758e-10	0.263358	0.556	0.321	1.0906e-06	Midgut forms	CYC2-like cyclin, putative
Tb927.10.5810	1.48675e-10	-0.358074	0.246	0.533	1.09737e-06	Midgut forms	The ARF-like 2 binding protein BART, putative
Tb927.11.680	1.55064e-10	0.287986	0.641	0.483	1.14453e-06	Midgut forms	ribosomal protein L21E (60S), putative
Tb927.6.510	1.65753e-10	0.786643	0.817	0.427	1.22342e-06	Midgut forms	GPEET procyclin
Tb927.10.5620	1.69878e-10	-0.359387	0.239	0.505	1.25387e-06	Midgut forms	fructose-bisphosphate aldolase, glycosomal
Tb927.11.10810	2.36554e-10	-0.352816	0.19	0.456	1.74601e-06	Midgut forms	pumillio/PUF RNA binding protein 11
Tb927.8.5440	3.174e-10	-0.358626	0.204	0.49	2.34273e-06	Midgut forms	flagellar calcium-binding 24 kDa protein
Tb927.10.14890	3.24024e-10	-0.355132	0.127	0.39	2.39162e-06	Midgut forms	C-terminal motor kinesin, putative
Tb927.7.7530	3.27146e-10	-0.367213	0.197	0.428	2.41466e-06	Midgut forms	receptor-type adenylate cyclase GRESAG 4, putative
Tb927.6.4980	3.95602e-10	0.282839	0.831	0.608	2.91994e-06	Midgut forms	40S ribosomal protein S14
Tb927.2.4700	4.02778e-10	0.270768	0.493	0.234	2.97291e-06	Midgut forms	succinate dehydrogenase subunit
Tb927.5.1830	5.50808e-10	-0.33885	0.282	0.547	4.06551e-06	Midgut forms	lysosomal/endosomal membrane protein p67
Tb927.9.13650	5.56298e-10	-0.331205	0.155	0.439	4.10603e-06	Midgut forms	ADP-ribosylation factor, putative
Tb927.5.2000	7.50917e-10	-0.343448	0.627	0.765	5.54252e-06	Midgut forms	hypothetical protein
Tb927.9.5690	8.6496e-10	0.280747	0.768	0.676	6.38427e-06	Midgut forms	60S acidic ribosomal protein, putative
Tb927.9.15460	9.4585e-10	0.251059	0.507	0.285	6.98132e-06	Midgut forms	calcium motive p-type ATPase, putative
Tb927.10.8430	1.08434e-09	0.267683	0.697	0.514	8.00353e-06	Midgut forms	40S ribosomal protein S12, putative
Tb927.11.8470	1.39602e-09	-0.334513	0.394	0.608	1.0304e-05	Midgut forms	zinc finger protein family member, putative
Tb927.3.2930	1.68562e-09	-0.408482	0.331	0.503	1.24416e-05	Midgut forms	RNA-binding protein RBP6, putative
Tb927.9.11490	1.69936e-09	0.258502	0.824	0.767	1.2543e-05	Midgut forms	60S ribosomal protein L29
Tb927.7.5170	2.21273e-09	0.278654	0.782	0.567	1.63321e-05	Midgut forms	60S ribosomal protein L25
Tb927.11.9700	2.55392e-09	0.263941	0.676	0.541	1.88504e-05	Midgut forms	transcription factor BTF3, putative
Tb927.11.880	3.1757e-09	-0.31772	0.232	0.489	2.34399e-05	Midgut forms	cyclophilin a
Tb927.3.600	3.70973e-09	-0.315639	0.085	0.352	2.73815e-05	Midgut forms	hypothetical protein
Tb927.7.6590	5.38291e-09	-0.318918	0.155	0.402	3.97313e-05	Midgut forms	hypothetical protein, conserved
Tb927.7.6000	5.44282e-09	-0.383714	0.197	0.35	4.01735e-05	Midgut forms	protein associated with differentiation 8, putative
Tb927.2.370	6.3312e-09	-0.299095	0.62	0.796	4.67306e-05	Midgut forms	retrotransposon hot spot protein 1 (RHS1), putative
Tb927.2.1080	8.36679e-09	-0.328076	0.401	0.61	6.17553e-05	Midgut forms	retrotransposon hot spot protein 5 (RHS5), putative
Tb927.10.190	9.67962e-09	0.260576	0.718	0.53	7.14453e-05	Midgut forms	40S ribosomal protein S6, putative
Tb927.7.4500	1.39271e-08	-0.291948	0.162	0.392	0.000102796	Midgut forms	PX domain containing protein, putative
Tb927.3.720	1.4167e-08	0.260742	0.782	0.586	0.000104567	Midgut forms	zinc finger protein 3
Tb927.8.4330	1.50535e-08	-0.300494	0.261	0.502	0.00011111	Midgut forms	small GTP-binding protein Rab11
Tb927.7.5960	1.69126e-08	-0.405494	0.261	0.365	0.000124832	Midgut forms	protein associated with differentiation 4, putative
Tb927.5.810	2.1378e-08	-0.297276	0.739	0.846	0.000157791	Midgut forms	zinc finger CCCH domain containing protein 11
Tb927.9.13070	2.36531e-08	-0.285018	0.134	0.37	0.000174584	Midgut forms	Heat shock factor binding 1 domain-containing protein
Tb927.4.2530	2.62119e-08	-0.293628	0.19	0.451	0.00019347	Midgut forms	hypothetical protein, conserved
Tb927.6.960	2.70928e-08	-0.298547	0.711	0.852	0.000199972	Midgut forms	cysteine peptidase, Clan CA, family C1, Cathepsin L-like
Tb927.7.230	2.82248e-08	0.25544	0.796	0.684	0.000208328	Midgut forms	40S ribosomal protein S33, putative
Tb927.3.4830	3.08182e-08	-0.300833	0.176	0.386	0.000227469	Midgut forms	hypothetical protein
Tb927.7.4470	3.29087e-08	-0.287575	0.19	0.422	0.000242899	Midgut forms	hypothetical protein, conserved
Tb927.10.11540	5.5627e-08	0.254013	0.683	0.532	0.000410583	Midgut forms	40S ribosomal protein S3, putative
Tbb1125VSG-385	6.41295e-08	-0.554683	0.049	0.157	0.00047334	Midgut forms	#N/A
Tb927.2.5910	9.82563e-08	0.250167	0.606	0.448	0.00072523	Midgut forms	40S ribosomal protein S13, putative
Tb927.8.1460	1.00243e-07	-0.271741	0.085	0.302	0.000739897	Midgut forms	EamA-like transporter family, putative
Tb927.7.5980	1.03925e-07	-0.335801	0.148	0.297	0.000767069	Midgut forms	protein associated with differentiation 6, putative
Tb927.6.1000	1.55407e-07	-0.276164	0.775	0.864	0.00114706	Midgut forms	cysteine peptidase, Clan CA, family C1, Cathepsin L-like
Tb927.11.4750	2.09596e-07	-0.272943	0.113	0.3	0.00154703	Midgut forms	hypothetical protein
Tb927.8.8330	2.10047e-07	-0.258932	0.162	0.388	0.00155036	Midgut forms	calpain, putative
Tb927.2.5290	2.18613e-07	-0.299233	0.204	0.375	0.00161358	Midgut forms	hypothetical protein, conserved
Tb927.8.6450	2.24068e-07	-0.28466	0.289	0.482	0.00165384	Midgut forms	inhibitor of cysteine peptidase
Tbb1125VSG-4564	2.37229e-07	-0.750539	0.204	0.354	0.00175098	Midgut forms	#N/A
Tb927.9.11100	3.29993e-07	-0.25352	0.176	0.398	0.00243568	Midgut forms	cAMP-dependent protein kinase catalytic subunit 1
Tb927.1.220	4.21947e-07	-0.27366	0.472	0.617	0.00311439	Midgut forms	retrotransposon hot spot protein 1 (RHS1), putative
Tb927.1.400	4.91877e-07	-0.276709	0.535	0.67	0.00363054	Midgut forms	hypothetical protein, conserved
Tb927.10.8830	6.68183e-07	-0.259504	0.232	0.435	0.00493186	Midgut forms	Flagellum attachment zone protein 5
Tb927.2.4920	6.94403e-07	-0.264642	0.127	0.299	0.00512539	Midgut forms	hypothetical protein, conserved
Tb927.4.5310	1.45451e-06	-0.262774	0.38	0.547	0.0107357	Midgut forms	Repressor of differentiation kinase 2
Tb927.3.1860	1.87892e-06	-0.373241	0.035	0.14	0.0138683	Midgut forms	ATP-grasp domain containing protein, putative
Tb927.8.890	1.89373e-06	-0.254285	0.62	0.747	0.0139776	Midgut forms	Ras-related protein Rab1A
Tb927.11.3650	2.8786e-06	-0.251611	0.387	0.553	0.0212469	Midgut forms	adenylosuccinate synthetase, putative
Tbb1125VSG-4959	4.39178e-06	-0.649886	0.049	0.156	0.0324157	Midgut forms	#N/A
Tb927.1.2150	2.46564e-05	-0.250221	0.232	0.369	0.181989	Midgut forms	Small kinetoplastid calpain-related protein 1-4
Tb927.9.15640	7.17065e-168	1.45872	0.946	0.291	5.29266e-164	Attached Epimastigote	BARP protein
Tb927.2.5290	9.80049e-107	0.748676	0.811	0.298	7.23374e-103	Attached Epimastigote	hypothetical protein, conserved
Tb927.2.4760	3.95734e-99	0.688775	0.743	0.235	2.92091e-95	Attached Epimastigote	hypothetical protein, conserved
Tb927.2.5610	5.57489e-99	0.645332	0.635	0.124	4.11482e-95	Attached Epimastigote	Present in the outer mitochondrial membrane proteome 22B
Tb927.2.5530	1.6331e-94	0.651959	0.666	0.156	1.20539e-90	Attached Epimastigote	Present in the outer mitochondrial membrane proteome 22-1
Tb927.6.220	2.10795e-87	0.55927	0.625	0.145	1.55588e-83	Attached Epimastigote	purine nucleoside transporter
Tb927.2.4920	5.28891e-87	0.650406	0.716	0.224	3.90375e-83	Attached Epimastigote	hypothetical protein, conserved
Tb927.8.7610	1.81977e-85	0.862343	0.868	0.323	1.34317e-81	Attached Epimastigote	amino acid transporter 1, putative
Tb927.1.2160	7.96555e-85	0.621073	0.726	0.219	5.87938e-81	Attached Epimastigote	Small kinetoplastid calpain-related protein 1-5
Tb927.10.7090	1.67299e-71	0.551863	0.983	0.883	1.23483e-67	Attached Epimastigote	Alternative oxidase, mitochondrial
Tb927.10.3210	3.57466e-71	0.544291	0.611	0.186	2.63846e-67	Attached Epimastigote	delta-1-pyrroline-5-carboxylate dehydrogenase, putative
Tb927.8.7740	1.6143e-69	0.614772	0.75	0.358	1.19152e-65	Attached Epimastigote	amino acid transporter, putative
Tb927.8.6580	1.70657e-63	0.623557	0.757	0.351	1.25962e-59	Attached Epimastigote	Succinate dehydrogenase [ubiquinone] flavoprotein subunit, mitochondrial
Tb927.2.4780	1.97254e-63	0.439637	0.551	0.159	1.45593e-59	Attached Epimastigote	hypothetical protein, conserved
Tb927.1.2110	5.53976e-58	0.470689	0.544	0.164	4.0889e-54	Attached Epimastigote	Calpain-like protein 1.2
Tb927.3.2930	5.10559e-57	0.716629	0.861	0.437	3.76844e-53	Attached Epimastigote	RNA-binding protein RBP6, putative
Tb927.9.5900	8.44179e-57	0.43836	0.537	0.152	6.23088e-53	Attached Epimastigote	glutamate dehydrogenase
Tb927.1.2150	3.57381e-56	0.628896	0.811	0.293	2.63783e-52	Attached Epimastigote	Small kinetoplastid calpain-related protein 1-4
Tb927.7.6000	2.70393e-55	0.736715	0.848	0.265	1.99577e-51	Attached Epimastigote	protein associated with differentiation 8, putative
Tb927.7.5950	2.13157e-54	0.812922	0.902	0.338	1.57331e-50	Attached Epimastigote	protein associated with differentiation 3, putative
Tb927.7.360	2.71109e-54	0.500851	0.473	0.096	2.00106e-50	Attached Epimastigote	hypothetical protein, conserved
Tb927.10.13700	2.12693e-53	0.481868	0.574	0.159	1.56989e-49	Attached Epimastigote	phosphatidic acid phosphatase alpha, putative
Tb927.10.14000	2.43264e-52	0.674589	0.736	0.334	1.79554e-48	Attached Epimastigote	aconitase
Tb927.7.5960	2.6747e-51	0.804956	0.875	0.282	1.9742e-47	Attached Epimastigote	protein associated with differentiation 4, putative
Tb927.7.5980	1.21241e-48	0.696955	0.804	0.211	8.94883e-45	Attached Epimastigote	protein associated with differentiation 6, putative
Tb927.8.970	7.41769e-48	0.357268	0.497	0.154	5.475e-44	Attached Epimastigote	hypothetical protein
Tb927.7.380	8.62237e-47	0.512222	0.497	0.108	6.36417e-43	Attached Epimastigote	hypothetical protein, conserved
Tb927.7.400	1.22963e-46	0.498235	0.483	0.092	9.07593e-43	Attached Epimastigote	hypothetical protein, conserved
Tb927.11.5720	2.96681e-46	0.392006	0.47	0.128	2.1898e-42	Attached Epimastigote	hypothetical protein, conserved
Tb927.8.3620	4.67064e-46	0.334042	0.358	0.075	3.4474e-42	Attached Epimastigote	folate transporter, putative
Tb927.11.4750	1.58736e-45	0.486123	0.628	0.238	1.17163e-41	Attached Epimastigote	hypothetical protein
Tb927.11.5960	1.59515e-44	0.562161	0.861	0.492	1.17738e-40	Attached Epimastigote	hypothetical protein, conserved
Tb927.10.6510	4.56172e-40	0.312497	0.368	0.091	3.367e-36	Attached Epimastigote	chaperonin HSP60, mitochondrial precursor
Tb927.2.4700	2.30494e-39	0.38098	0.554	0.205	1.70127e-35	Attached Epimastigote	succinate dehydrogenase subunit
Tb927.1.2340	1.08664e-37	0.411008	0.99	0.962	8.0205e-34	Attached Epimastigote	alpha tubulin
Tb927.2.1080	3.33758e-37	0.437676	0.851	0.559	2.46346e-33	Attached Epimastigote	retrotransposon hot spot protein 5 (RHS5), putative
Tb927.6.2490	3.83005e-37	0.355956	0.503	0.19	2.82696e-33	Attached Epimastigote	succinate dehydrogenase subunit 7
Tb927.10.13410	2.88472e-35	0.335894	0.466	0.175	2.12921e-31	Attached Epimastigote	hypothetical protein
Tb927.7.6560	8.77496e-35	-0.606986	0.098	0.523	6.4768e-31	Attached Epimastigote	hypothetical protein, conserved
Tb927.1.2320	1.18517e-33	0.449329	0.963	0.838	8.74776e-30	Attached Epimastigote	Cardiolipin-dependent protein 35kDa
Tb927.1.4490	2.22706e-33	0.408261	0.669	0.365	1.6438e-29	Attached Epimastigote	acetyltransferase, putative
Tb927.7.210	2.66345e-33	0.314992	0.385	0.111	1.96589e-29	Attached Epimastigote	Proline dehydrogenase, mitochondrial
Tb927.11.11680	5.52878e-33	0.469316	0.706	0.343	4.08079e-29	Attached Epimastigote	2-oxoglutarate dehydrogenase E2 component, putative
Tb927.1.4650	9.19616e-33	-0.502775	0.791	0.883	6.78769e-29	Attached Epimastigote	cyclin-like F-box protein 2
Tb927.7.6570	1.4869e-32	-0.557557	0.122	0.519	1.09748e-28	Attached Epimastigote	Enriched in surface-labeled proteome protein 17
Tb927.3.2230	1.61575e-32	0.265246	0.355	0.091	1.19258e-28	Attached Epimastigote	succinyl-CoA synthetase alpha subunit, putative
Tb927.7.6600	2.3025e-32	-0.544913	0.142	0.531	1.69947e-28	Attached Epimastigote	hypothetical protein, conserved
Tb927.11.15960	1.14654e-31	0.324344	0.409	0.158	8.46265e-28	Attached Epimastigote	amino acid transporter, putative
Tb927.5.630	1.34651e-31	-0.526911	0.145	0.539	9.93861e-28	Attached Epimastigote	acidic phosphatase, putative
Tb927.11.16130	1.56605e-31	0.275682	0.439	0.152	1.1559e-27	Attached Epimastigote	nucleoside diphosphate kinase
Tb927.3.3930	2.15774e-31	0.285651	0.426	0.149	1.59263e-27	Attached Epimastigote	RNA-binding protein
Tb927.10.10770	2.02027e-30	0.569344	0.797	0.363	1.49116e-26	Attached Epimastigote	Generative cell specific 1 protein, putative
Tb927.2.3460	4.46177e-30	0.284383	0.338	0.096	3.29323e-26	Attached Epimastigote	cysteine peptidase, Clan CA, family C51, putative
Tb927.7.6580	4.78072e-30	-0.515833	0.152	0.512	3.52865e-26	Attached Epimastigote	hypothetical protein
Tb927.5.810	5.74831e-30	-0.439828	0.669	0.864	4.24283e-26	Attached Epimastigote	zinc finger CCCH domain containing protein 11
Tb927.7.6550	9.71125e-30	-0.512351	0.166	0.511	7.16788e-26	Attached Epimastigote	hypothetical protein, conserved
Tb927.11.900	3.18052e-29	0.260308	0.328	0.1	2.34754e-25	Attached Epimastigote	isocitrate dehydrogenase, putative
Tb927.10.12800	9.85225e-29	-0.488162	0.314	0.639	7.27195e-25	Attached Epimastigote	Zinc finger CCCH domain-containing protein 38
Tb927.2.340	1.8573e-27	0.381234	0.831	0.597	1.37087e-23	Attached Epimastigote	retrotransposon hot spot protein 4 (RHS4), putative
Tb927.3.3730	3.13076e-27	0.282838	0.365	0.122	2.31081e-23	Attached Epimastigote	ABC transporter, putative
Tb927.3.3270	4.36564e-27	-0.484039	0.139	0.486	3.22228e-23	Attached Epimastigote	ATP-dependent 6-phosphofructokinase, glycosomal
Tb927.1.110	6.87218e-26	0.356433	0.814	0.597	5.07236e-22	Attached Epimastigote	hypothetical protein, conserved
Tb927.11.4740	1.34177e-25	0.262769	0.385	0.128	9.90358e-22	Attached Epimastigote	paraflagellar rod component, putative
Tb927.10.7410	2.03202e-25	0.290113	0.453	0.193	1.49984e-21	Attached Epimastigote	succinyl-CoA ligase [GDP-forming] beta-chain, putative
Tb927.6.4840	2.52069e-25	0.383315	0.662	0.416	1.86052e-21	Attached Epimastigote	S-adenosylmethionine synthetase
Tb927.6.140	5.81242e-25	0.314595	0.578	0.288	4.29015e-21	Attached Epimastigote	retrotransposon hot spot protein 5 (RHS5), putative
Tb927.10.1500	2.70445e-24	0.263754	0.311	0.1	1.99615e-20	Attached Epimastigote	methionyl-tRNA synthetase, putative
Tbb1125VSG-1654	2.80736e-24	-1.12836	0.169	0.331	2.07211e-20	Attached Epimastigote	#N/A
Tb927.7.6490	3.63904e-24	-0.453501	0.074	0.417	2.68598e-20	Attached Epimastigote	hypothetical protein, conserved
Tb927.1.2330	3.804e-24	0.35865	0.902	0.754	2.80773e-20	Attached Epimastigote	beta tubulin
Tb927.7.7520	1.55639e-23	-0.42421	0.196	0.491	1.14877e-19	Attached Epimastigote	receptor-type adenylate cyclase GRESAG 4, putative
Tb927.3.2960	3.24929e-23	0.333245	0.524	0.281	2.3983e-19	Attached Epimastigote	inosine-adenosine-guanosine-nucleosidehydrolase
Tb927.10.12500	3.6553e-22	0.26803	0.436	0.189	2.69798e-18	Attached Epimastigote	P-type H+-ATPase, putative
Tb927.7.7530	4.41018e-22	-0.404807	0.166	0.45	3.25515e-18	Attached Epimastigote	receptor-type adenylate cyclase GRESAG 4, putative
Tb927.7.6590	2.38968e-21	-0.382312	0.122	0.427	1.76382e-17	Attached Epimastigote	hypothetical protein, conserved
Tb927.2.560	3.42631e-21	0.310808	0.689	0.44	2.52896e-17	Attached Epimastigote	retrotransposon hot spot protein 4 (RHS4), putative
Tb927.10.14820	4.77678e-21	0.251237	0.392	0.162	3.52574e-17	Attached Epimastigote	Mitochondrial ADP/ATP carrier protein 5c
Tb927.5.510	8.04506e-21	0.265399	0.412	0.181	5.93806e-17	Attached Epimastigote	putative succinate dehydrogenase subunit
Tb927.3.1790	5.11905e-20	0.269171	0.419	0.214	3.77837e-16	Attached Epimastigote	pyruvate dehydrogenase E1 beta subunit, putative
Tb927.5.2000	1.26558e-19	-0.357777	0.557	0.786	9.34126e-16	Attached Epimastigote	hypothetical protein
Tb927.2.450	9.8611e-19	0.299623	0.831	0.631	7.27848e-15	Attached Epimastigote	retrotransposon hot spot protein 4 (RHS4), putative
Tb927.4.3950	1.06232e-18	0.300261	0.507	0.214	7.84098e-15	Attached Epimastigote	cytoskeleton-associated protein CAP5.5, putative
Tb927.5.310	1.3388e-18	-0.346721	0.193	0.473	9.88169e-15	Attached Epimastigote	invariant surface glycoprotein, putative
Tb927.10.8440	1.85108e-18	-0.337899	0.132	0.414	1.36628e-14	Attached Epimastigote	glucose transporter 1B
Tb927.1.3950	3.66797e-18	0.292208	0.598	0.278	2.70733e-14	Attached Epimastigote	alanine aminotransferase
Tbb1125VSG-393	4.73748e-18	-0.832917	0.267	0.427	3.49674e-14	Attached Epimastigote	#N/A
Tb927.7.2180	5.26391e-18	0.258097	0.422	0.196	3.88529e-14	Attached Epimastigote	T. brucei spp.-specific protein, putative
Tb927.2.3270	6.52935e-18	-0.340378	0.179	0.455	4.81932e-14	Attached Epimastigote	65 kDa invariant surface glycoprotein
Tbb1125VSG-4862	6.929e-18	-0.934041	0.199	0.346	5.11429e-14	Attached Epimastigote	#N/A
Tb927.10.2090	1.1303e-17	0.320777	0.75	0.607	8.34274e-14	Attached Epimastigote	elongation factor 1-alpha
Tb927.9.5960	2.79259e-17	0.267379	0.534	0.384	2.06121e-13	Attached Epimastigote	succinate dehydrogenase iron-sulfur subunit, putative
Tb927.6.450	5.53464e-17	-0.660905	0.409	0.48	4.08512e-13	Attached Epimastigote	procyclin PARP A
Tb927.10.14890	7.79033e-16	-0.30974	0.166	0.405	5.75004e-12	Attached Epimastigote	C-terminal motor kinesin, putative
Tb927.8.5470	8.11538e-16	-0.293951	0.162	0.404	5.98996e-12	Attached Epimastigote	flagellar calcium-binding 24 kDa protein
Tb927.3.600	8.69864e-16	-0.293573	0.122	0.368	6.42046e-12	Attached Epimastigote	hypothetical protein
Tb927.5.350	1.05219e-15	-0.330147	0.372	0.608	7.76621e-12	Attached Epimastigote	75 kDa invariant surface glycoprotein, putative
Tb927.11.10810	2.13795e-15	-0.303266	0.216	0.473	1.57802e-11	Attached Epimastigote	pumillio/PUF RNA binding protein 11
Tb927.5.820	1.12401e-14	-0.284931	0.24	0.464	8.29635e-11	Attached Epimastigote	hypothetical protein, conserved
Tb927.5.2480	3.97673e-14	-0.293089	0.311	0.527	2.93522e-10	Attached Epimastigote	hypothetical protein, conserved
Tb927.11.8470	7.94055e-13	-0.273916	0.48	0.612	5.86092e-09	Attached Epimastigote	zinc finger protein family member, putative
Tb927.10.2010	8.23194e-13	-0.252229	0.125	0.327	6.076e-09	Attached Epimastigote	hexokinase
Tbb1125VSG-4564	1.15237e-12	-0.750405	0.203	0.366	8.50565e-09	Attached Epimastigote	#N/A
Tb927.3.4830	1.33033e-12	-0.26929	0.203	0.398	9.81917e-09	Attached Epimastigote	hypothetical protein
Tb927.8.5440	2.14054e-12	-0.275177	0.294	0.499	1.57993e-08	Attached Epimastigote	flagellar calcium-binding 24 kDa protein
Tbb1125VSG-4959	3.64561e-12	-0.69872	0.088	0.159	2.69082e-08	Attached Epimastigote	#N/A
Tb927.6.1520	4.28272e-12	-0.277646	0.301	0.505	3.16107e-08	Attached Epimastigote	Aquaglyceroporin 1
Tb927.3.3430	1.33219e-11	0.311167	0.997	0.98	9.83286e-08	Attached Epimastigote	hypothetical protein, conserved
Tb927.10.10250	1.41021e-11	-0.465548	0.274	0.369	1.04088e-07	Attached Epimastigote	EP2 procyclin
Tb927.4.2740	1.69603e-11	-0.261655	0.801	0.843	1.25184e-07	Attached Epimastigote	p25-alpha, putative
Tb927.5.4170	2.64192e-10	-0.320135	0.328	0.487	1.95e-06	Attached Epimastigote	histone H4, putative
Tb927.7.2820	9.79395e-09	-0.306034	0.375	0.468	7.22891e-05	Attached Epimastigote	histone H2A, putative
Tb927.9.7470	2.99708e-08	-0.274701	0.226	0.308	0.000221215	Attached Epimastigote	purine nucleoside transporter
Tb927.3.1860	4.78991e-08	-0.329515	0.061	0.144	0.000353543	Attached Epimastigote	ATP-grasp domain containing protein, putative
Tb927.10.10260	2.97063e-07	-0.390887	0.581	0.591	0.00219262	Attached Epimastigote	EP1 procyclin
Tbb1125VSG-385	7.18479e-06	-0.406523	0.098	0.158	0.0530309	Attached Epimastigote	#N/A
Tb927.6.510	0.000654696	-0.271242	0.48	0.447	1	Attached Epimastigote	GPEET procyclin
Tb927.6.510	6.14677e-95	1.51506	0.825	0.399	4.53693e-91	Gametes	GPEET procyclin
Tb927.7.2820	3.70062e-93	1.0265	0.718	0.419	2.73143e-89	Gametes	histone H2A, putative
Tb927.10.10260	4.74796e-88	1.43936	0.875	0.549	3.50447e-84	Gametes	EP1 procyclin
Tb927.4.2740	5.77966e-88	-0.956663	0.35	0.905	4.26597e-84	Gametes	p25-alpha, putative
Tb927.7.2000	3.79785e-84	0.504762	0.393	0.03	2.80319e-80	Gametes	retrotransposon hot spot protein 7 (RHS7), putative
Tb927.7.1980	6.30471e-83	0.505734	0.4	0.027	4.65351e-79	Gametes	retrotransposon hot spot protein 7 (RHS7), putative
Tb927.7.2020	1.08637e-77	0.466357	0.379	0.034	8.0185e-74	Gametes	retrotransposon hot spot protein 7 (RHS7), putative
Tb927.7.1960	6.52038e-77	0.482603	0.425	0.063	4.81269e-73	Gametes	retrotransposon hot spot protein 7 (RHS7), putative
Tb927.7.2030	3.5108e-75	0.46947	0.411	0.063	2.59132e-71	Gametes	retrotransposon hot spot protein 7 (RHS7), putative
Tb927.4.3990	3.65415e-72	0.594207	0.557	0.162	2.69713e-68	Gametes	amino acid transporter, putative
Tb927.9.14570	7.21904e-71	0.42834	0.4	0.045	5.32838e-67	Gametes	leucine-rich repeat protein (LRRP), putative
Tb927.7.1970	1.6156e-70	0.447742	0.343	0.022	1.19248e-66	Gametes	retrotransposon hot spot protein 7 (RHS7), putative
Tb927.7.5980	1.29083e-63	0.786867	0.764	0.221	9.52761e-60	Gametes	protein associated with differentiation 6, putative
Tb927.1.4650	3.15217e-63	-0.7534	0.582	0.911	2.32661e-59	Gametes	cyclin-like F-box protein 2
Tb927.7.6000	1.62178e-61	0.784791	0.8	0.276	1.19704e-57	Gametes	protein associated with differentiation 8, putative
Tb927.7.5960	2.4097e-60	0.876042	0.854	0.29	1.7786e-56	Gametes	protein associated with differentiation 4, putative
Tb927.5.4170	4.00291e-59	0.813916	0.632	0.443	2.95455e-55	Gametes	histone H4, putative
Tb927.1.2420	2.45035e-58	0.602363	0.757	0.428	1.8086e-54	Gametes	hypothetical protein
Tb927.7.5950	7.8628e-56	0.841661	0.832	0.353	5.80353e-52	Gametes	protein associated with differentiation 3, putative
Tb927.11.1860	3.37126e-55	0.606021	0.629	0.37	2.48833e-51	Gametes	histone H1
Tb927.1.2430	6.12071e-54	0.600372	0.807	0.584	4.51769e-50	Gametes	histone H3, putative
Tb927.10.10770	1.32092e-53	0.742948	0.825	0.363	9.74973e-50	Gametes	Generative cell specific 1 protein, putative
Tb927.7.2010	1.37726e-52	0.304804	0.282	0.019	1.01655e-48	Gametes	retrotransposon hot spot protein 7 (RHS7), putative
Tb927.11.1800	9.09881e-51	0.594185	0.671	0.454	6.71583e-47	Gametes	histone H1
Tb927.11.16550	3.268e-48	-0.572659	0.643	0.918	2.41211e-44	Gametes	Zinc finger protein, C3H1 type-like
Tb927.10.10460	5.01518e-46	0.617163	0.561	0.396	3.70171e-42	Gametes	histone H2B, putative
Tb927.2.2670	8.47142e-46	0.475798	0.632	0.264	6.25275e-42	Gametes	histone H4 variant
Tb927.10.10590	1.69674e-45	0.623558	0.582	0.412	1.25236e-41	Gametes	histone H2B, putative
Tbb1125VSG-393	9.79071e-42	-1.19821	0.171	0.439	7.22652e-38	Gametes	#N/A
Tb927.10.12800	1.44019e-41	-0.65852	0.193	0.653	1.063e-37	Gametes	Zinc finger CCCH domain-containing protein 38
Tb927.3.2930	1.88502e-39	0.629616	0.818	0.447	1.39133e-35	Gametes	RNA-binding protein RBP6, putative
Tbb1125VSG-4862	8.67343e-38	-1.25503	0.114	0.357	6.40186e-34	Gametes	#N/A
Tb927.11.5960	1.26165e-36	0.528052	0.818	0.501	9.31227e-33	Gametes	hypothetical protein, conserved
Tb927.9.10230	2.70134e-36	0.362405	0.414	0.176	1.99386e-32	Gametes	Co-chaperone protein P23
Tbb1125VSG-4564	2.18859e-35	-1.15393	0.157	0.371	1.6154e-31	Gametes	#N/A
Tb927.7.4730	2.75622e-35	0.320773	0.411	0.131	2.03437e-31	Gametes	pumilio/PUF RNA binding protein 5
Tb927.4.4020	8.37816e-35	0.424516	0.514	0.216	6.18392e-31	Gametes	amino acid transporter, putative
Tb927.7.7110	2.42509e-34	0.318961	0.311	0.086	1.78996e-30	Gametes	leucine-rich repeat protein (LRRP), putative
Tb927.7.6560	5.02438e-33	-0.616635	0.107	0.518	3.70849e-29	Gametes	hypothetical protein, conserved
Tb927.7.6600	6.31792e-33	-0.619056	0.096	0.534	4.66326e-29	Gametes	hypothetical protein, conserved
Tb927.5.2000	2.70619e-32	-0.496228	0.496	0.793	1.99744e-28	Gametes	hypothetical protein
Tb927.8.7610	4.24723e-32	0.606836	0.796	0.338	3.13488e-28	Gametes	amino acid transporter 1, putative
Tb927.7.6570	4.95432e-32	-0.603299	0.1	0.519	3.65678e-28	Gametes	Enriched in surface-labeled proteome protein 17
Tb927.7.6550	9.4748e-32	-0.588216	0.114	0.516	6.99335e-28	Gametes	hypothetical protein, conserved
Tb927.1.2150	1.40059e-31	0.506313	0.696	0.314	1.03378e-27	Gametes	Small kinetoplastid calpain-related protein 1-4
Tb927.11.11680	1.40918e-31	0.471251	0.625	0.357	1.04011e-27	Gametes	2-oxoglutarate dehydrogenase E2 component, putative
Tbb1125VSG-1654	4.14846e-31	-1.245	0.186	0.328	3.06198e-27	Gametes	#N/A
Tb927.7.6580	4.46706e-31	-0.569189	0.118	0.514	3.29714e-27	Gametes	hypothetical protein
Tb927.1.370	4.50949e-31	0.296683	0.411	0.168	3.32845e-27	Gametes	leucine-rich repeat protein (LRRP), putative
Tb927.5.630	4.76908e-31	-0.546527	0.143	0.536	3.52005e-27	Gametes	acidic phosphatase, putative
Tb927.2.950	4.86072e-31	0.283068	0.339	0.102	3.5877e-27	Gametes	paraflagellar rod component, putative
Tb927.10.10980	2.15613e-30	0.35906	0.946	0.942	1.59144e-26	Gametes	heat shock protein 90, putative
Tb927.1.2820	8.37081e-30	0.539138	0.746	0.364	6.17849e-26	Gametes	pteridine transporter, putative
Tb927.3.3270	1.07032e-29	-0.564095	0.107	0.488	7.90004e-26	Gametes	ATP-dependent 6-phosphofructokinase, glycosomal
Tb927.6.4280	1.69723e-29	-0.536673	0.161	0.516	1.25272e-25	Gametes	glyceraldehyde 3-phosphate dehydrogenase, glycosomal
Tb927.7.210	4.92904e-29	0.303424	0.411	0.11	3.63813e-25	Gametes	Proline dehydrogenase, mitochondrial
Tb927.7.5790	6.89599e-29	-0.494962	0.257	0.588	5.08993e-25	Gametes	protein disulfide isomerase, putative
Tb927.7.7180	4.34933e-28	0.266855	0.325	0.116	3.21024e-24	Gametes	leucine-rich repeat protein 1 (LRRP1), putative
Tb927.11.13270	1.16345e-27	-0.468961	0.246	0.593	8.58746e-24	Gametes	hypothetical protein, conserved
Tb927.10.5620	1.22634e-27	-0.477525	0.164	0.534	9.0516e-24	Gametes	fructose-bisphosphate aldolase, glycosomal
Tb927.11.8470	2.56547e-27	-0.453097	0.314	0.634	1.89357e-23	Gametes	zinc finger protein family member, putative
Tb927.11.6680	7.60628e-27	0.256842	0.339	0.108	5.6142e-23	Gametes	amino acid permease/transporter, putative
Tb927.8.6750	1.92813e-26	0.260007	0.418	0.145	1.42316e-22	Gametes	translationally controlled tumor protein (TCTP), putative
Tb927.10.10000	2.61616e-26	0.271905	0.346	0.11	1.93099e-22	Gametes	hypothetical protein, conserved
Tb927.8.890	6.78316e-26	-0.426239	0.486	0.775	5.00665e-22	Gametes	Ras-related protein Rab1A
Tb927.5.350	2.49817e-25	-0.45375	0.314	0.614	1.8439e-21	Gametes	75 kDa invariant surface glycoprotein, putative
Tb927.10.14000	3.13536e-25	0.502005	0.714	0.341	2.31421e-21	Gametes	aconitase
Tb927.1.3950	3.63289e-25	0.351476	0.521	0.291	2.68144e-21	Gametes	alanine aminotransferase
Tb927.2.690	1.61648e-24	0.293959	0.393	0.185	1.19312e-20	Gametes	leucine-rich repeat protein (LRRP), putative
Tb927.1.2230	4.39455e-24	0.328632	0.471	0.19	3.24362e-20	Gametes	small myristoylated protein 1-1
Tb927.7.7520	1.13116e-23	-0.440753	0.189	0.49	8.34906e-20	Gametes	receptor-type adenylate cyclase GRESAG 4, putative
Tb927.3.5080	1.37415e-23	0.352567	0.421	0.189	1.01426e-19	Gametes	PSP1 C-terminal conserved region, putative
Tb927.5.810	2.22198e-23	-0.391217	0.686	0.86	1.64004e-19	Gametes	zinc finger CCCH domain containing protein 11
Tb927.7.6490	1.15868e-22	-0.478051	0.057	0.417	8.55224e-19	Gametes	hypothetical protein, conserved
Tb927.10.10250	1.59752e-22	0.818885	0.621	0.319	1.17913e-18	Gametes	EP2 procyclin
Tb927.3.2960	2.92872e-22	0.334316	0.561	0.278	2.16169e-18	Gametes	inosine-adenosine-guanosine-nucleosidehydrolase
Tb927.7.6590	7.09577e-22	-0.413873	0.1	0.427	5.23739e-18	Gametes	hypothetical protein, conserved
Tb927.1.580	8.73014e-22	0.378611	0.618	0.317	6.44372e-18	Gametes	phosphate-repressible phosphate permease, putative
Tb927.10.2890	1.91986e-21	-0.398961	0.121	0.439	1.41705e-17	Gametes	enolase
Tb927.7.400	4.50981e-21	0.36811	0.407	0.106	3.32869e-17	Gametes	hypothetical protein, conserved
Tb927.5.310	5.75844e-21	-0.389158	0.164	0.474	4.25031e-17	Gametes	invariant surface glycoprotein, putative
Tb927.11.4750	6.38149e-21	0.349579	0.521	0.256	4.71017e-17	Gametes	hypothetical protein
Tb927.10.13700	4.19769e-20	0.320784	0.45	0.18	3.09832e-16	Gametes	phosphatidic acid phosphatase alpha, putative
Tb927.8.5440	4.3323e-20	-0.381786	0.236	0.506	3.19767e-16	Gametes	flagellar calcium-binding 24 kDa protein
Tb927.8.7820	5.54667e-20	-0.372432	0.596	0.755	4.094e-16	Gametes	'Cold-shock' DNA-binding domain containing protein, putative
Tb927.10.12500	8.177e-20	0.259442	0.457	0.188	6.03544e-16	Gametes	P-type H+-ATPase, putative
Tb927.7.2180	1.26093e-19	0.276165	0.464	0.192	9.3069e-16	Gametes	T. brucei spp.-specific protein, putative
Tb927.7.7530	4.28183e-19	-0.379057	0.182	0.446	3.16042e-15	Gametes	receptor-type adenylate cyclase GRESAG 4, putative
Tb927.10.5810	4.46009e-19	-0.360184	0.275	0.548	3.29199e-15	Gametes	The ARF-like 2 binding protein BART, putative
Tb927.10.8830	5.75616e-19	-0.353794	0.161	0.459	4.24862e-15	Gametes	Flagellum attachment zone protein 5
Tb927.5.2400	1.24917e-18	0.257503	0.425	0.218	9.2201e-15	Gametes	Peptidase C19, ubiquitin carboxyl-terminal hydrolase, putative
Tb927.10.14890	1.62923e-18	-0.356593	0.143	0.406	1.20253e-14	Gametes	C-terminal motor kinesin, putative
Tb927.10.8440	3.17291e-18	-0.347169	0.143	0.41	2.34193e-14	Gametes	glucose transporter 1B
Tb927.7.5380	3.42924e-18	0.271326	0.4	0.211	2.53112e-14	Gametes	Double RNA binding domain protein 12
Tb927.11.10810	3.4645e-18	-0.348085	0.211	0.472	2.55714e-14	Gametes	pumillio/PUF RNA binding protein 11
Tb927.7.380	4.63091e-18	0.348624	0.411	0.124	3.41807e-14	Gametes	hypothetical protein, conserved
Tb927.10.8940	1.04278e-17	-0.333455	0.721	0.857	7.69677e-14	Gametes	flagellum targeting protein kharon1, putative
Tb927.3.3940	1.68839e-17	-0.330609	0.539	0.755	1.2462e-13	Gametes	RNA-binding protein, putative
Tb927.8.5470	6.88854e-17	-0.318909	0.125	0.408	5.08443e-13	Gametes	flagellar calcium-binding 24 kDa protein
Tbb1125VSG-4959	1.93301e-16	-0.772526	0.064	0.162	1.42675e-12	Gametes	#N/A
Tb927.3.4830	3.04049e-16	-0.326037	0.154	0.404	2.24418e-12	Gametes	hypothetical protein
Tb927.4.1910	7.08728e-16	0.277656	0.464	0.203	5.23112e-12	Gametes	hypothetical protein, conserved
Tb927.7.2090	9.66438e-16	-0.317779	0.304	0.527	7.13328e-12	Gametes	hypothetical protein, conserved
Tb927.10.6050	2.34314e-15	-0.315398	0.343	0.583	1.72947e-11	Gametes	clathrin heavy chain
Tb927.8.1460	3.07369e-15	-0.301242	0.079	0.318	2.26869e-11	Gametes	EamA-like transporter family, putative
Tb927.5.1830	3.43644e-15	-0.306436	0.346	0.557	2.53644e-11	Gametes	lysosomal/endosomal membrane protein p67
Tb927.1.2160	5.16814e-15	0.300037	0.518	0.253	3.81461e-11	Gametes	Small kinetoplastid calpain-related protein 1-5
Tb927.8.4520	5.78294e-15	-0.287072	0.079	0.331	4.26839e-11	Gametes	hypothetical protein, conserved
Tb927.9.8740	8.24377e-15	-0.309299	0.4	0.612	6.08473e-11	Gametes	Double RNA binding domain protein 3
Tb927.9.13070	1.3683e-14	-0.282922	0.136	0.386	1.00994e-10	Gametes	Heat shock factor binding 1 domain-containing protein
Tb927.10.2010	1.9661e-14	-0.28466	0.1	0.329	1.45118e-10	Gametes	hexokinase
Tb927.11.3650	2.08717e-14	-0.303321	0.357	0.568	1.54054e-10	Gametes	adenylosuccinate synthetase, putative
Tb927.10.5250	7.9801e-14	-0.286233	0.304	0.509	5.89011e-10	Gametes	zinc finger protein family member, putative
Tb927.2.1080	9.07731e-14	0.277279	0.718	0.58	6.69996e-10	Gametes	retrotransposon hot spot protein 5 (RHS5), putative
Tb927.10.15350	3.62403e-13	0.261602	0.764	0.57	2.6749e-09	Gametes	histone H3 variant V
Tb927.5.1810	4.55088e-13	-0.28265	0.418	0.6	3.35901e-09	Gametes	lysosomal/endosomal membrane protein p67
Tb927.2.5610	9.92209e-13	0.280094	0.436	0.156	7.3235e-09	Gametes	Present in the outer mitochondrial membrane proteome 22B
Tb927.8.3530	1.24787e-12	-0.260171	0.157	0.351	9.21053e-09	Gametes	glycerol-3-phosphate dehydrogenase [NAD+], glycosomal
Tb927.5.2480	2.07418e-12	-0.278283	0.304	0.526	1.53095e-08	Gametes	hypothetical protein, conserved
Tb927.2.3270	2.75285e-12	-0.276772	0.229	0.446	2.03188e-08	Gametes	65 kDa invariant surface glycoprotein
Tb927.3.600	3.63366e-12	-0.253197	0.164	0.36	2.68201e-08	Gametes	hypothetical protein
Tb927.2.5530	6.09741e-12	0.272726	0.457	0.19	4.50049e-08	Gametes	Present in the outer mitochondrial membrane proteome 22-1
Tb927.8.3770	6.29373e-12	-0.251359	0.207	0.419	4.6454e-08	Gametes	Mitogen-activated protein kinase 10, putative
Tb927.5.820	1.73958e-11	-0.250943	0.25	0.461	1.28399e-07	Gametes	hypothetical protein, conserved
Tb927.2.340	1.97719e-11	0.250967	0.746	0.61	1.45937e-07	Gametes	retrotransposon hot spot protein 4 (RHS4), putative
Tb927.6.450	4.17385e-11	0.616611	0.732	0.434	3.08072e-07	Gametes	procyclin PARP A
Tbb1125VSG-385	5.84732e-11	-0.525949	0.089	0.159	4.31591e-07	Gametes	#N/A
Tb927.8.7740	4.50043e-10	0.25319	0.604	0.382	3.32177e-06	Gametes	amino acid transporter, putative
Tb927.10.9080	6.10299e-10	0.254822	0.679	0.486	4.50462e-06	Gametes	pteridine transporter, putative
Tb927.3.1860	3.16859e-09	-0.353339	0.075	0.142	2.33874e-05	Gametes	ATP-grasp domain containing protein, putative
Tb927.9.15640	4.14416e-05	0.320436	0.611	0.344	0.305881	Gametes	BARP protein
Tb927.3.1860	2.75224e-153	1.30742	0.555	0.065	2.03143e-149	Pre-metacyclic	ATP-grasp domain containing protein, putative
Tb927.1.2320	3.79607e-76	-0.790556	0.606	0.894	2.80188e-72	Pre-metacyclic	Cardiolipin-dependent protein 35kDa
Tb927.6.1070	1.90066e-47	-0.587472	0.467	0.813	1.40287e-43	Pre-metacyclic	hypothetical protein, conserved
Tb927.10.930	2.3767e-45	0.399755	0.347	0.12	1.75424e-41	Pre-metacyclic	hypothetical protein, conserved
Tb927.3.3430	2.53251e-42	0.586836	1	0.98	1.86925e-38	Pre-metacyclic	hypothetical protein, conserved
Tb927.1.220	3.38094e-37	-0.518132	0.23	0.669	2.49547e-33	Pre-metacyclic	retrotransposon hot spot protein 1 (RHS1), putative
Tb927.1.180	5.17463e-36	-0.4824	0.407	0.778	3.81939e-32	Pre-metacyclic	retrotransposon hot spot protein 1 (RHS1), putative
Tb927.2.470	1.94304e-35	-0.473633	0.549	0.816	1.43416e-31	Pre-metacyclic	retrotransposon hot spot protein 4 (RHS4), putative
Tb927.6.1000	4.47826e-34	-0.454863	0.716	0.881	3.3054e-30	Pre-metacyclic	cysteine peptidase, Clan CA, family C1, Cathepsin L-like
Tb927.7.5000	2.3576e-33	-0.460886	0.41	0.771	1.74015e-29	Pre-metacyclic	60S ribosomal protein L19, putative
Tb927.10.70	6.71236e-29	-0.415766	0.489	0.776	4.95439e-25	Pre-metacyclic	retrotransposon hot spot (RHS), putative, (fragment)
Tb927.2.370	1.47407e-28	-0.401121	0.587	0.817	1.08801e-24	Pre-metacyclic	retrotransposon hot spot protein 1 (RHS1), putative
Tb927.4.3550	1.07397e-27	-0.420502	0.303	0.658	7.92698e-24	Pre-metacyclic	60S ribosomal protein L13a, putative
Tb927.6.960	2.95829e-26	-0.397356	0.716	0.863	2.18351e-22	Pre-metacyclic	cysteine peptidase, Clan CA, family C1, Cathepsin L-like
Tb927.2.1210	4.36674e-26	-0.358992	0.748	0.888	3.22309e-22	Pre-metacyclic	retrotransposon hot spot protein 4 (RHS4), putative
Tb927.3.5050	2.95885e-23	-0.357699	0.609	0.825	2.18393e-19	Pre-metacyclic	60S ribosomal protein L4
Tb927.1.400	1.88331e-21	-0.366468	0.438	0.698	1.39007e-17	Pre-metacyclic	hypothetical protein, conserved
Tb927.7.6560	3.34539e-21	-0.405482	0.237	0.505	2.46923e-17	Pre-metacyclic	hypothetical protein, conserved
Tb927.7.6490	6.73385e-21	-0.37351	0.132	0.411	4.97026e-17	Pre-metacyclic	hypothetical protein, conserved
Tb927.2.280	2.14208e-20	-0.33706	0.177	0.487	1.58107e-16	Pre-metacyclic	retrotransposon hot spot protein 2 (RHS2), putative
Tb927.2.400	2.93548e-20	-0.343361	0.215	0.536	2.16668e-16	Pre-metacyclic	retrotransposon hot spot protein 2 (RHS2), putative
Tb927.6.2100	6.57282e-20	-0.344912	0.259	0.545	4.8514e-16	Pre-metacyclic	40S ribosomal protein S30, putative
Tb927.7.6570	1.38115e-19	-0.378495	0.262	0.501	1.01942e-15	Pre-metacyclic	Enriched in surface-labeled proteome protein 17
Tb927.2.450	2.14198e-19	-0.341268	0.416	0.696	1.58099e-15	Pre-metacyclic	retrotransposon hot spot protein 4 (RHS4), putative
Tb927.7.6580	3.6629e-19	-0.369766	0.259	0.499	2.70359e-15	Pre-metacyclic	hypothetical protein
Tb927.11.6890	6.09519e-19	-0.375856	0.782	0.917	4.49886e-15	Pre-metacyclic	DNA repair and recombination helicase protein PIF1
Tb927.2.380	9.47045e-19	-0.336496	0.29	0.568	6.99014e-15	Pre-metacyclic	retrotransposon hot spot protein 2 (RHS2), putative
Tb927.10.5370	1.25743e-18	-0.329334	0.423	0.685	9.2811e-15	Pre-metacyclic	40S ribosomal protein S10, putative
Tb927.2.340	1.9347e-18	-0.342888	0.382	0.667	1.428e-14	Pre-metacyclic	retrotransposon hot spot protein 4 (RHS4), putative
Tb927.7.5980	5.94833e-18	-0.37964	0.117	0.315	4.39046e-14	Pre-metacyclic	protein associated with differentiation 6, putative
Tb927.10.10980	1.86593e-17	-0.288356	0.931	0.944	1.37724e-13	Pre-metacyclic	heat shock protein 90, putative
Tb927.8.5260	3.54287e-17	-0.314466	0.344	0.619	2.61499e-13	Pre-metacyclic	60S ribosomal protein L39, putative
Tb927.7.6550	1.76607e-16	-0.340788	0.278	0.497	1.30354e-12	Pre-metacyclic	hypothetical protein, conserved
Tb927.11.6500	2.37867e-16	-0.297298	0.416	0.683	1.7557e-12	Pre-metacyclic	40S ribosomal protein S21, putative
Tb927.1.540	4.44051e-16	-0.286701	0.183	0.442	3.27754e-12	Pre-metacyclic	DNA-directed RNA polymerase III, putative
Tb927.2.5910	7.35248e-16	-0.294978	0.208	0.498	5.42687e-12	Pre-metacyclic	40S ribosomal protein S13, putative
Tb927.1.110	7.86828e-16	-0.305812	0.429	0.657	5.80758e-12	Pre-metacyclic	hypothetical protein, conserved
Tb927.8.6150	9.84667e-16	-0.304368	0.353	0.618	7.26783e-12	Pre-metacyclic	40S ribosomal protein S8, putative
Tb927.5.295b	1.06778e-15	-0.27455	0.17	0.434	7.88131e-12	Pre-metacyclic	retrotransposon hotspot (RHS) protein 1
Tb927.9.8100	1.23606e-15	-0.279549	0.278	0.548	9.12335e-12	Pre-metacyclic	nascent polypeptide associated complex subunit, putative
Tb927.8.1870	1.84239e-15	0.270251	0.707	0.599	1.35987e-11	Pre-metacyclic	Golgi/lysosome glycoprotein 1
Tb927.1.2340	7.08745e-15	-0.270764	0.956	0.967	5.23125e-11	Pre-metacyclic	alpha tubulin
Tb927.10.7330	1.12594e-14	-0.29431	0.372	0.613	8.31058e-11	Pre-metacyclic	40S ribosomal protein S24E, putative
Tb927.7.7530	3.21526e-14	-0.296968	0.23	0.443	2.37319e-10	Pre-metacyclic	receptor-type adenylate cyclase GRESAG 4, putative
Tb927.11.6300	4.38211e-14	-0.281123	0.555	0.731	3.23444e-10	Pre-metacyclic	40S ribosomal protein S5, putative
Tb927.9.6090	5.30421e-14	-0.262778	0.211	0.449	3.91504e-10	Pre-metacyclic	PTP1-interacting protein, 39 kDa
Tb927.10.11540	5.82052e-14	-0.275394	0.331	0.575	4.29612e-10	Pre-metacyclic	40S ribosomal protein S3, putative
Tb927.10.6370	2.42789e-13	-0.267674	0.284	0.525	1.79202e-09	Pre-metacyclic	60S ribosomal proteins L37, putative
Tb927.10.5330	2.73147e-13	-0.259405	0.719	0.819	2.0161e-09	Pre-metacyclic	40S ribosomal protein S18, putative
Tb927.3.3310	3.57479e-13	-0.25419	0.577	0.732	2.63855e-09	Pre-metacyclic	60S ribosomal protein L13, putative
Tb927.8.6180	1.0107e-12	-0.270634	0.341	0.594	7.45996e-09	Pre-metacyclic	60S ribosomal protein L26, putative
Tb927.11.680	2.03458e-12	-0.250773	0.287	0.526	1.50172e-08	Pre-metacyclic	ribosomal protein L21E (60S), putative
Tb927.10.190	2.47083e-12	-0.251715	0.322	0.577	1.82372e-08	Pre-metacyclic	40S ribosomal protein S6, putative
Tb927.9.8420	2.52986e-12	-0.254893	0.379	0.607	1.86729e-08	Pre-metacyclic	QM-like protein
Tb927.11.6140	4.14239e-12	-0.25018	0.36	0.608	3.0575e-08	Pre-metacyclic	40S ribosomal protein S15A, putative
Tb927.1.2420	1.58305e-10	-0.256352	0.265	0.502	1.16845e-06	Pre-metacyclic	hypothetical protein
Tb927.7.5960	2.39015e-10	-0.322629	0.281	0.372	1.76417e-06	Pre-metacyclic	protein associated with differentiation 4, putative
Tb927.7.6000	3.03988e-08	-0.25691	0.259	0.354	0.000224374	Pre-metacyclic	protein associated with differentiation 8, putative
Tb927.9.15640	2.73475e-06	-0.311272	0.397	0.373	0.0201852	Pre-metacyclic	BARP protein
Tbb1125VSG-4862	0.000949058	-0.407237	0.669	0.272	1	Pre-metacyclic	#N/A
Tb927.6.510	0.0012426	-0.250769	0.577	0.431	1	Pre-metacyclic	GPEET procyclin
Tb927.10.10260	6.14508e-227	-1.31382	0.431	0.78	4.53569e-223	Metacyclics	EP1 procyclin
Tb927.6.450	3.13342e-203	-1.32558	0.294	0.683	2.31277e-199	Metacyclics	procyclin PARP A
Tb927.6.510	7.37205e-173	-1.18078	0.287	0.649	5.44131e-169	Metacyclics	GPEET procyclin
Tb927.1.2820	8.19025e-164	-0.749649	0.182	0.687	6.04522e-160	Metacyclics	pteridine transporter, putative
Tb927.7.6560	3.987e-163	0.758126	0.735	0.147	2.9428e-159	Metacyclics	hypothetical protein, conserved
Tb927.7.5950	2.83683e-162	-0.82542	0.215	0.647	2.09387e-158	Metacyclics	protein associated with differentiation 3, putative
Tb927.9.15640	1.4036e-159	-0.99648	0.211	0.576	1.036e-155	Metacyclics	BARP protein
Tb927.10.10770	4.97983e-156	-0.75706	0.201	0.682	3.67561e-152	Metacyclics	Generative cell specific 1 protein, putative
Tb927.7.6570	1.18318e-153	0.719539	0.72	0.164	8.73302e-150	Metacyclics	Enriched in surface-labeled proteome protein 17
Tb927.7.5960	1.5683e-151	-0.799315	0.156	0.603	1.15756e-147	Metacyclics	protein associated with differentiation 4, putative
Tb927.8.7610	2.02562e-146	-0.738868	0.2	0.627	1.49511e-142	Metacyclics	amino acid transporter 1, putative
Tb927.7.6580	1.31601e-143	0.682926	0.707	0.176	9.71344e-140	Metacyclics	hypothetical protein
Tb927.1.4650	2.62827e-142	0.625899	0.965	0.757	1.93993e-138	Metacyclics	cyclin-like F-box protein 2
Tb927.7.6550	1.02849e-141	0.677792	0.701	0.185	7.5913e-138	Metacyclics	hypothetical protein, conserved
Tb927.10.14000	5.36112e-136	-0.683854	0.192	0.62	3.95705e-132	Metacyclics	aconitase
Tb927.7.6000	1.4025e-134	-0.703326	0.154	0.565	1.03518e-130	Metacyclics	protein associated with differentiation 8, putative
Tb927.7.6600	5.54767e-131	0.639487	0.708	0.207	4.09473e-127	Metacyclics	hypothetical protein, conserved
Tb927.10.10250	4.25967e-127	-0.968323	0.221	0.519	3.14406e-123	Metacyclics	EP2 procyclin
Tb927.7.6490	4.87971e-114	0.620305	0.607	0.091	3.60171e-110	Metacyclics	hypothetical protein, conserved
Tb927.4.2740	5.08683e-114	0.531737	0.938	0.716	3.75459e-110	Metacyclics	p25-alpha, putative
Tb927.7.5980	1.88607e-111	-0.6343	0.117	0.493	1.39211e-107	Metacyclics	protein associated with differentiation 6, putative
Tb927.11.5960	1.34368e-108	-0.585581	0.387	0.724	9.91768e-105	Metacyclics	hypothetical protein, conserved
Tb927.1.2150	1.92994e-107	-0.574431	0.179	0.579	1.42449e-103	Metacyclics	Small kinetoplastid calpain-related protein 1-4
Tb927.3.2930	2.28349e-102	-0.627732	0.35	0.663	1.68544e-98	Metacyclics	RNA-binding protein RBP6, putative
Tb927.7.7530	3.29152e-95	0.527693	0.596	0.194	2.42947e-91	Metacyclics	receptor-type adenylate cyclase GRESAG 4, putative
Tb927.7.7520	1.90068e-88	0.508854	0.622	0.249	1.40289e-84	Metacyclics	receptor-type adenylate cyclase GRESAG 4, putative
Tb927.11.11680	1.24378e-85	-0.497588	0.236	0.576	9.18032e-82	Metacyclics	2-oxoglutarate dehydrogenase E2 component, putative
Tb927.3.3430	3.16297e-78	-0.551559	0.975	0.991	2.33459e-74	Metacyclics	hypothetical protein, conserved
Tb927.2.5530	5.99457e-77	-0.4402	0.074	0.401	4.42459e-73	Metacyclics	Present in the outer mitochondrial membrane proteome 22-1
Tb927.5.630	7.84187e-77	0.476945	0.667	0.272	5.78808e-73	Metacyclics	acidic phosphatase, putative
Tb927.10.14890	2.19982e-74	0.439912	0.539	0.175	1.62369e-70	Metacyclics	C-terminal motor kinesin, putative
Tb927.3.3270	5.95523e-74	0.487581	0.614	0.233	4.39555e-70	Metacyclics	ATP-dependent 6-phosphofructokinase, glycosomal
Tb927.10.12800	2.04554e-70	0.467729	0.772	0.386	1.50981e-66	Metacyclics	Zinc finger CCCH domain-containing protein 38
Tb927.6.3490	2.05874e-69	-0.446667	0.81	0.929	1.51956e-65	Metacyclics	zinc finger protein 1
Tb927.2.5610	2.52296e-69	-0.415285	0.049	0.359	1.86219e-65	Metacyclics	Present in the outer mitochondrial membrane proteome 22B
Tb927.10.3210	2.81082e-69	-0.391887	0.1	0.41	2.07467e-65	Metacyclics	delta-1-pyrroline-5-carboxylate dehydrogenase, putative
Tb927.1.2160	1.90149e-66	-0.404338	0.154	0.443	1.40349e-62	Metacyclics	Small kinetoplastid calpain-related protein 1-5
Tb927.7.6590	6.17393e-65	0.407613	0.548	0.193	4.55697e-61	Metacyclics	hypothetical protein, conserved
Tb927.11.4750	6.11032e-64	-0.393099	0.159	0.443	4.51003e-60	Metacyclics	hypothetical protein
Tb927.1.400	9.48912e-64	0.40643	0.773	0.528	7.00392e-60	Metacyclics	hypothetical protein, conserved
Tb927.2.5290	9.79796e-64	-0.436753	0.245	0.508	7.23187e-60	Metacyclics	hypothetical protein, conserved
Tb927.4.3950	1.85558e-63	-0.370848	0.117	0.414	1.36961e-59	Metacyclics	cytoskeleton-associated protein CAP5.5, putative
Tb927.8.6580	6.99126e-63	-0.43661	0.288	0.543	5.16025e-59	Metacyclics	Succinate dehydrogenase [ubiquinone] flavoprotein subunit, mitochondrial
Tb927.1.580	1.93103e-61	-0.409817	0.214	0.522	1.42529e-57	Metacyclics	phosphate-repressible phosphate permease, putative
Tb927.11.10810	3.09963e-60	0.388167	0.589	0.26	2.28784e-56	Metacyclics	pumillio/PUF RNA binding protein 11
Tb927.1.3950	7.1169e-60	-0.36548	0.188	0.477	5.25299e-56	Metacyclics	alanine aminotransferase
Tb927.5.810	7.6749e-60	0.378758	0.916	0.747	5.66484e-56	Metacyclics	zinc finger CCCH domain containing protein 11
Tb927.1.2330	6.41814e-59	-0.393073	0.708	0.852	4.73723e-55	Metacyclics	beta tubulin
Tb927.10.13700	1.94924e-56	-0.343059	0.096	0.355	1.43873e-52	Metacyclics	phosphatidic acid phosphatase alpha, putative
Tb927.1.2230	2.99215e-56	-0.332699	0.1	0.375	2.2085e-52	Metacyclics	small myristoylated protein 1-1
Tb927.1.2110	8.20596e-55	-0.326983	0.093	0.358	6.05682e-51	Metacyclics	Calpain-like protein 1.2
Tb927.7.380	1.57526e-54	-0.353092	0.054	0.285	1.1627e-50	Metacyclics	hypothetical protein, conserved
Tb927.9.7470	1.74603e-54	-0.502557	0.211	0.401	1.28875e-50	Metacyclics	purine nucleoside transporter
Tb927.9.5900	3.14015e-54	-0.313299	0.084	0.344	2.31775e-50	Metacyclics	glutamate dehydrogenase
Tb927.3.600	5.58039e-54	0.347968	0.481	0.161	4.11889e-50	Metacyclics	hypothetical protein
Tb927.3.1860	7.40258e-53	-0.606916	0.068	0.213	5.46385e-49	Metacyclics	ATP-grasp domain containing protein, putative
Tbb1125VSG-4862	3.93687e-52	1.13172	0.337	0.315	2.90581e-48	Metacyclics	#N/A
Tb927.2.4700	6.96868e-52	-0.312185	0.129	0.397	5.14358e-48	Metacyclics	succinate dehydrogenase subunit
Tb927.6.220	2.17873e-51	-0.318553	0.096	0.342	1.60812e-47	Metacyclics	purine nucleoside transporter
Tb927.8.5470	3.9833e-51	0.337558	0.505	0.214	2.94007e-47	Metacyclics	flagellar calcium-binding 24 kDa protein
Tb927.7.400	1.97211e-50	-0.332563	0.042	0.264	1.45561e-46	Metacyclics	hypothetical protein, conserved
Tb927.7.5940	8.65991e-49	-0.296864	0.081	0.323	6.39188e-45	Metacyclics	Protein Associated with Differentiation
Tb927.10.9080	1.29198e-48	-0.385059	0.424	0.613	9.53609e-45	Metacyclics	pteridine transporter, putative
Tb927.7.210	1.5462e-47	-0.282201	0.035	0.281	1.14125e-43	Metacyclics	Proline dehydrogenase, mitochondrial
Tb927.10.2560	1.97492e-47	-0.309011	0.126	0.37	1.45769e-43	Metacyclics	mitochondrial malate dehydrogenase
Tb927.5.350	3.39154e-47	0.371494	0.703	0.426	2.5033e-43	Metacyclics	75 kDa invariant surface glycoprotein, putative
Tb927.8.7740	6.63676e-47	-0.367867	0.315	0.522	4.89859e-43	Metacyclics	amino acid transporter, putative
Tb927.7.360	1.03382e-46	-0.306033	0.05	0.259	7.63063e-43	Metacyclics	hypothetical protein, conserved
Tb927.8.8300	1.26858e-46	-0.281971	0.064	0.295	9.3634e-43	Metacyclics	amino acid transporter, putative
Tb927.2.4760	1.8193e-46	-0.353668	0.209	0.412	1.34283e-42	Metacyclics	hypothetical protein, conserved
Tb927.4.1910	4.3903e-46	-0.30761	0.123	0.37	3.24048e-42	Metacyclics	hypothetical protein, conserved
Tb927.7.5790	4.5918e-46	0.364071	0.678	0.39	3.38921e-42	Metacyclics	protein disulfide isomerase, putative
Tb927.2.1080	7.95822e-46	-0.349068	0.52	0.69	5.87396e-42	Metacyclics	retrotransposon hot spot protein 5 (RHS5), putative
Tb927.5.820	2.12107e-45	0.323355	0.564	0.279	1.56556e-41	Metacyclics	hypothetical protein, conserved
Tb927.9.13070	4.42629e-45	0.310009	0.486	0.199	3.26705e-41	Metacyclics	Heat shock factor binding 1 domain-containing protein
Tb927.10.2010	9.92248e-45	0.313142	0.419	0.158	7.32378e-41	Metacyclics	hexokinase
Tb927.11.8470	1.21285e-44	0.3343	0.706	0.461	8.95207e-41	Metacyclics	zinc finger protein family member, putative
Tb927.2.3270	1.56272e-44	0.341811	0.551	0.261	1.15345e-40	Metacyclics	65 kDa invariant surface glycoprotein
Tb927.5.2000	2.77597e-44	0.340365	0.854	0.64	2.04895e-40	Metacyclics	hypothetical protein
Tb927.6.4280	9.54186e-44	0.380312	0.586	0.335	7.04285e-40	Metacyclics	glyceraldehyde 3-phosphate dehydrogenase, glycosomal
Tb927.10.7410	1.1584e-43	-0.269873	0.121	0.354	8.55018e-40	Metacyclics	succinyl-CoA ligase [GDP-forming] beta-chain, putative
Tbb1125VSG-1654	2.76147e-43	1.14153	0.292	0.332	2.03824e-39	Metacyclics	#N/A
Tb927.2.4920	1.67534e-42	-0.333698	0.195	0.399	1.23657e-38	Metacyclics	hypothetical protein, conserved
Tb927.10.8440	6.57077e-42	0.318103	0.514	0.213	4.84989e-38	Metacyclics	glucose transporter 1B
Tb927.4.3990	8.91558e-42	-0.30705	0.116	0.325	6.58059e-38	Metacyclics	amino acid transporter, putative
Tb927.1.180	2.02532e-41	0.313527	0.818	0.617	1.49489e-37	Metacyclics	retrotransposon hot spot protein 1 (RHS1), putative
Tb927.5.310	2.77922e-41	0.326345	0.576	0.269	2.05134e-37	Metacyclics	invariant surface glycoprotein, putative
Tb927.8.6710	2.09051e-40	0.262936	0.301	0.058	1.54301e-36	Metacyclics	hypothetical protein, conserved
Tb927.10.8830	6.32457e-40	0.308039	0.54	0.281	4.66817e-36	Metacyclics	Flagellum attachment zone protein 5
Tbb1125VSG-393	2.21193e-39	0.88736	0.423	0.386	1.63263e-35	Metacyclics	#N/A
Tb927.8.5440	9.41517e-39	0.322631	0.592	0.329	6.94933e-35	Metacyclics	flagellar calcium-binding 24 kDa protein
Tb927.6.4840	7.53865e-38	-0.323974	0.359	0.556	5.56428e-34	Metacyclics	S-adenosylmethionine synthetase
Tb927.7.2180	6.23661e-37	-0.254277	0.126	0.344	4.60324e-33	Metacyclics	T. brucei spp.-specific protein, putative
Tb927.8.1460	7.23069e-37	0.282033	0.396	0.159	5.33697e-33	Metacyclics	EamA-like transporter family, putative
Tbb1125VSG-4564	9.09087e-37	0.918858	0.344	0.345	6.70997e-33	Metacyclics	#N/A
Tb927.11.2690	1.02615e-36	-0.296264	0.24	0.447	7.57402e-33	Metacyclics	Succinyl-CoA:3-ketoacid coenzyme A transferase, mitochondrial
Tb927.8.890	1.93966e-36	0.300324	0.833	0.627	1.43166e-32	Metacyclics	Ras-related protein Rab1A
Tb927.3.2960	1.1966e-35	-0.282866	0.219	0.424	8.83207e-32	Metacyclics	inosine-adenosine-guanosine-nucleosidehydrolase
Tb927.1.1470	1.31251e-35	-0.273616	0.208	0.421	9.68765e-32	Metacyclics	conserved protein, unknown function
Tb927.8.6450	1.92848e-35	0.306162	0.571	0.348	1.42341e-31	Metacyclics	inhibitor of cysteine peptidase
Tb927.2.370	1.34251e-34	0.274993	0.847	0.71	9.90907e-31	Metacyclics	retrotransposon hot spot protein 1 (RHS1), putative
Tb927.10.2890	3.05606e-34	0.294133	0.512	0.266	2.25568e-30	Metacyclics	enolase
Tb927.4.4020	2.61804e-33	-0.270886	0.169	0.354	1.93238e-29	Metacyclics	amino acid transporter, putative
Tb927.10.70	5.32417e-33	0.275831	0.824	0.63	3.92977e-29	Metacyclics	retrotransposon hot spot (RHS), putative, (fragment)
Tb927.1.2340	5.42413e-32	-0.268777	0.963	0.968	4.00355e-28	Metacyclics	alpha tubulin
Tb927.1.220	6.98853e-32	0.2824	0.701	0.496	5.15823e-28	Metacyclics	retrotransposon hot spot protein 1 (RHS1), putative
Tb927.5.2160	9.57509e-32	-0.266096	0.148	0.305	7.06737e-28	Metacyclics	conserved protein
Tb927.7.2820	1.61633e-31	-0.418459	0.423	0.496	1.19301e-27	Metacyclics	histone H2A, putative
Tb927.2.2670	1.84775e-30	-0.266334	0.224	0.412	1.36382e-26	Metacyclics	histone H4 variant
Tb927.7.7090	7.93155e-30	-0.282099	0.178	0.305	5.85428e-26	Metacyclics	hypothetical protein, conserved
Tb927.5.4170	7.88208e-28	-0.37236	0.449	0.487	5.81776e-24	Metacyclics	histone H4, putative
Tbb1125VSG-4959	4.24641e-26	0.827947	0.137	0.164	3.13428e-22	Metacyclics	#N/A
Tb927.11.1800	7.86816e-26	-0.291319	0.429	0.542	5.80749e-22	Metacyclics	histone H1
Tb927.11.13270	9.51027e-26	0.260321	0.633	0.45	7.01953e-22	Metacyclics	hypothetical protein, conserved
Tbb1125VSG-385	3.28455e-16	0.540625	0.129	0.175	2.42432e-12	Metacyclics	#N/A
